1 Heritability of the *Symbiodinium* community in vertically- and horizontally-transmitting  
2 broadcast spawning corals

3

4 Kate M. Quigley<sup>1,2\*</sup>, Bette L. Willis<sup>1,2</sup>, Line K. Bay<sup>2,3</sup>

5

6 <sup>1</sup>ARC Centre of Excellence for Coral Reef Studies, and College of Marine and  
7 Environmental Sciences, James Cook University, Townsville, QLD 4811, Australia

8 <sup>2</sup>AIMS@JCU, Australian Institute of Marine Science and James Cook University,  
9 Townsville, QLD 4811, Australia

10 <sup>3</sup>Australian Institute of Marine Science, PMB3, Townsville, Queensland 4810, Australia

11

12 \*Corresponding author: KM Quigley

13 Address: College of Marine and Environmental Sciences, James Cook University,  
14 Townsville, QLD 4811, Australia

15 Email: [katemarie.quigley@my.jcu.edu.au](mailto:katemarie.quigley@my.jcu.edu.au)

16

17

18

19

20

21

22

23

24

25

26

27

28

29

30

31

32

33

34

35 **Abstract**

36 The dinoflagellate-coral partnership influences host tolerance to thermal stress that  
37 causes bleaching. However, the comparative roles of host genetic versus environmental  
38 factors in determining the composition of this symbiosis are largely unknown. Here we  
39 quantify the heritability of *Symbiodinium* communities in two broadcast spawning  
40 corals with different symbiont transmission modes: *Acropora tenuis* has environmental  
41 acquisition, and *Montipora digitata* has maternal transmission. Using high throughput  
42 sequencing of the ITS-2 region to characterize communities in parental colonies,  
43 juveniles and eggs, we describe new *Symbiodinium* types in both coral species and  
44 previously unknown symbiont dynamics. After one month of natural uptake in the field,  
45 *Symbiodinium* communities associated with *A. tenuis* juveniles were dominated by A3,  
46 C1, D1, A-type CCMP828, and D1a in proportional abundances that were conserved  
47 across two years. In contrast, *M. digitata* eggs were predominantly characterized by  
48 C15, D1, and A3. On average, host genetic influences accounted for 29% of phenotypic  
49 variation found in *Symbiodinium* communities in *A. tenuis* and 62% in *M. digitata*. Our  
50 results reveal hitherto unknown flexibility in the acquisition of *Symbiodinium*  
51 communities and substantial heritability in both species provides ample material for  
52 selection to produce partnerships that are locally adapted to changing environmental  
53 conditions.

## 54 **Introduction**

55 Coral bleaching, defined as either the loss of *Symbiodinium* cells from coral tissues or  
56 reduction in symbiont photosynthetic pigments, represents a threat to coral reefs world-wide  
57 as it increases in both frequency and magnitude<sup>1-4</sup>. If coral reefs are to persist under climate  
58 change, corals must either disperse to new unaffected habitats, acclimate through phenotypic  
59 plasticity, and/or adapt through evolutionary mechanisms<sup>5</sup>. However, the extent to which  
60 thermal tolerance can increase through changes to the host genome, *Symbiodinium*  
61 community hosted, or direct selection on the symbionts themselves is currently unclear.

62 Bleaching sensitivity is variable within and among species<sup>6</sup>, but the mechanisms  
63 causing this variability remain relatively unknown. Although the coral hosts have a repertoire  
64 of molecular mechanisms that provide some capacity to respond to thermal stress (e.g.  
65 antioxidant pathways and fluorescent pigments)<sup>7-9</sup>, the *Symbiodinium* community hosted by  
66 corals has long been recognized as the primary factor determining bleaching susceptibility  
67<sup>10,11</sup>. Recent evidence shows that bleaching is primarily caused by the expulsion of  
68 *Symbiodinium* cells, rather than host-cell degradation or host-cell detachment<sup>12</sup>, and further  
69 corroborates the hypothesis that coral holobiont stress responses are driven by attributes of  
70 the photosymbiont. The increased adaptive potential of *Symbiodinium*, because of their short  
71 generation times and large population sizes compared to corals<sup>13</sup>, raises the possibility these  
72 endosymbiotic communities could influence host adaptation to changing climates through  
73 increased host niche expansion<sup>14,15</sup>. A major impediment to understanding the capacity of  
74 corals to adapt to a changing climate is the lack of knowledge about the extent to which  
75 *Symbiodinium* communities associated with corals are inherited and hence subject to  
76 selection.

77 There are nine recognized *Symbiodinium* clades<sup>16</sup> which encompass substantial  
78 sequence and functional variation at the intra-clade (type) level (reviewed in<sup>17</sup>). Traditional  
79 technologies used in the field have most often overlooked taxonomic resolution at the type  
80 level, leading to the majority of studies comparing *Symbiodinium* communities at the clade  
81 level and generally only for dominant symbionts. Deep sequencing technologies currently  
82 available can detect type level diversity even at low abundances<sup>18</sup> and are now being applied  
83 to understand adult coral-*Symbiodinium* diversity<sup>19-21</sup>, but are lacking for the early life-  
84 history stages of corals. Therefore, there are gaps in our basic knowledge of the composition  
85 of *Symbiodinium* communities at lower, functionally relevant taxonomic levels, in particular,  
86 those at background abundances and in the eggs and juveniles of corals.

87 Natural variation in the composition of coral-associated *Symbiodinium* communities  
88 exists among coral populations and species<sup>17,22</sup>, with certain communities offering greater  
89 bleaching resistance compared to others<sup>23,24</sup>. It is not yet known what enhances or constrains  
90 the capacity of corals to harbour stress tolerant *Symbiodinium* types and whether changes to  
91 *Symbiodinium* communities in response to environmental stressors are stochastic or  
92 deterministic<sup>25</sup>. Given the importance of *Symbiodinium* communities for bleaching  
93 susceptibility and mortality of the coral holobiont<sup>26,27</sup>, quantifying the proportional  
94 contributions of genetic and environmental factors to community formation, regulation and  
95 stress tolerance is important for understanding coral health. If the *Symbiodinium* community  
96 is heritable, changes to these communities may bring about adaptation of the holobiont as a  
97 whole. Under this scenario, *Symbiodinium* community shifts are equivalent to changes in host  
98 allele frequencies, thus opening up new avenues for natural and artificial selection, assisted  
99 evolution and microbiome engineering<sup>25,28</sup>.

100 *Symbiodinium* communities associated with scleractinian corals are either acquired  
101 from the environment (horizontal transfer) or passed maternally from adults to eggs or larvae  
102 (vertical transfer). Approximately 85% of scleractinian coral species broadcast spawn eggs  
103 and sperm into the environment, and of these, ~80% acquire symbionts horizontally; the  
104 remaining ~20% acquire them vertically<sup>29</sup>. Vertically-transmitted symbiont communities are  
105 predominantly found in brooding corals with internal fertilization<sup>29</sup> and are theorized to be of  
106 lower diversity and higher fidelity<sup>17</sup>. Conversely, horizontal transmission has generally been  
107 assumed to result in weaker fidelity that can be increased through the development of strong  
108 genotype- associations between host and symbiont community<sup>30</sup>. Studies specifically  
109 quantifying the genetic component governing the *Symbiodinium* community established in  
110 offspring of both horizontal and vertical transmitters are needed to elucidate the potential for  
111 adaptation through symbiont community changes.

112 Heritability describes the genetic components of variability in a trait using analysis of  
113 co-variance among individuals with different relatedness<sup>31</sup>. The ratio of additive genetic  
114 variance to phenotypic variance ( $V_A/V_P$ ) is defined as narrow-sense heritability ( $h^2$ )<sup>32</sup>. The  
115 degree of heritability of a trait ranges from 0 - 1, and describes the influence of parental  
116 genetics on the variability of that trait<sup>32</sup>. Therefore, the degree to which traits might change  
117 from one generation to the next can be predicted from measures of heritability, where the  
118 predicted change in offspring phenotype is proportional to  $h^2$  (i.e., the breeder's equation)<sup>33</sup>.  
119 It is particularly important to determine the genetic contribution to understand the potential

120 for adaptation and to predict the strength of response to selection (i.e., the ‘evolvability’ of a  
121 trait)<sup>5,34,35</sup>.

122 To quantify the potential for selection of endosymbiotic *Symbiodinium* communities  
123 associated with broadcast spawning corals in response to changes in environmental  
124 conditions (i.e., climate change-induced), we characterized symbiont communities associated  
125 with adults, juveniles and eggs of the horizontal transmitter *Acropora tenuis* and the vertical  
126 transmitter *Montipora digitata* using high-throughput sequencing. Using a community  
127 diversity metric, we derive the narrow-sense heritability ( $h^2$ ) of these communities and  
128 identify new and unique *Symbiodinium* types recovered from juveniles and eggs compared to  
129 their parental colonies. Finally, we describe previously unknown *Symbiodinium* community  
130 dynamics in the early life- history stages of these two common coral species.

131

## 132 **Results**

### 133 ***Symbiodinium* communities associated with *Acropora tenuis***

134 After one month in the field, there were clear similarities at the clade level between  
135 *Symbiodinium* communities associated with the 2012 and 2013 families of *A. tenuis* juveniles,  
136 with 54 OTUs (17.1%) shared between the two years (Fig. 1, Supplementary Table S4). In  
137 both years, the majority of OTUs were recovered from three clades (A, C, and D) and the  
138 number of OTUs from each of these clades was similar between years (Supplementary Table  
139 S4). The greatest diversity of OTUs found in juveniles from both years belonged to C1, A3  
140 and uncultured types, and a diversity of different OTUs within types A13, CCMP828, D1 and  
141 D1a were also present (Supplementary Fig. S1). The predominant patterns characterising  
142 *Symbiodinium* communities associated with the 2012 and 2013 families were the high  
143 abundance of *Symbiodinium* types A3, C1, D1, and A-type CCMP828, and the comparatively  
144 lower abundance of D1a (Fig. 2). However, substantial variation in *Symbiodinium* diversity  
145 and abundance existed between juveniles within the same family as well as between families  
146 of juveniles (supplementary results, Fig. 2). For example, juvenile families differed in their  
147 average OTU diversity and abundance as well as taxonomic composition (additional  
148 description in supplementary results, Fig. 2, Supplementary Table S5), where particular  
149 families contained juveniles of particularly high diversity (F14 and F18).

150 Juveniles from both years harboured more unique OTUs compared to adults  
151 (Juveniles vs. adults: 111 vs. 2 (2012), 151 vs. 2 (2013)), with far fewer OTUs shared  
152 between life stages (2012: 21, 2013: 28) (Fig. 1). Furthermore, the majority of OTUs in both  
153 years were at background abundances (Fig. 1). The majority of OTUs were also rare (112 -

154 172 OTUs found in less than 25% of samples in 2012 and 2013), whilst 4 - 16 OTUs were  
155 common (25 -75% of samples), and 5 - 6 OTUs were core members (two A3 types,  
156 CCMP828, C1, D1, D1a) (Fig. 1).

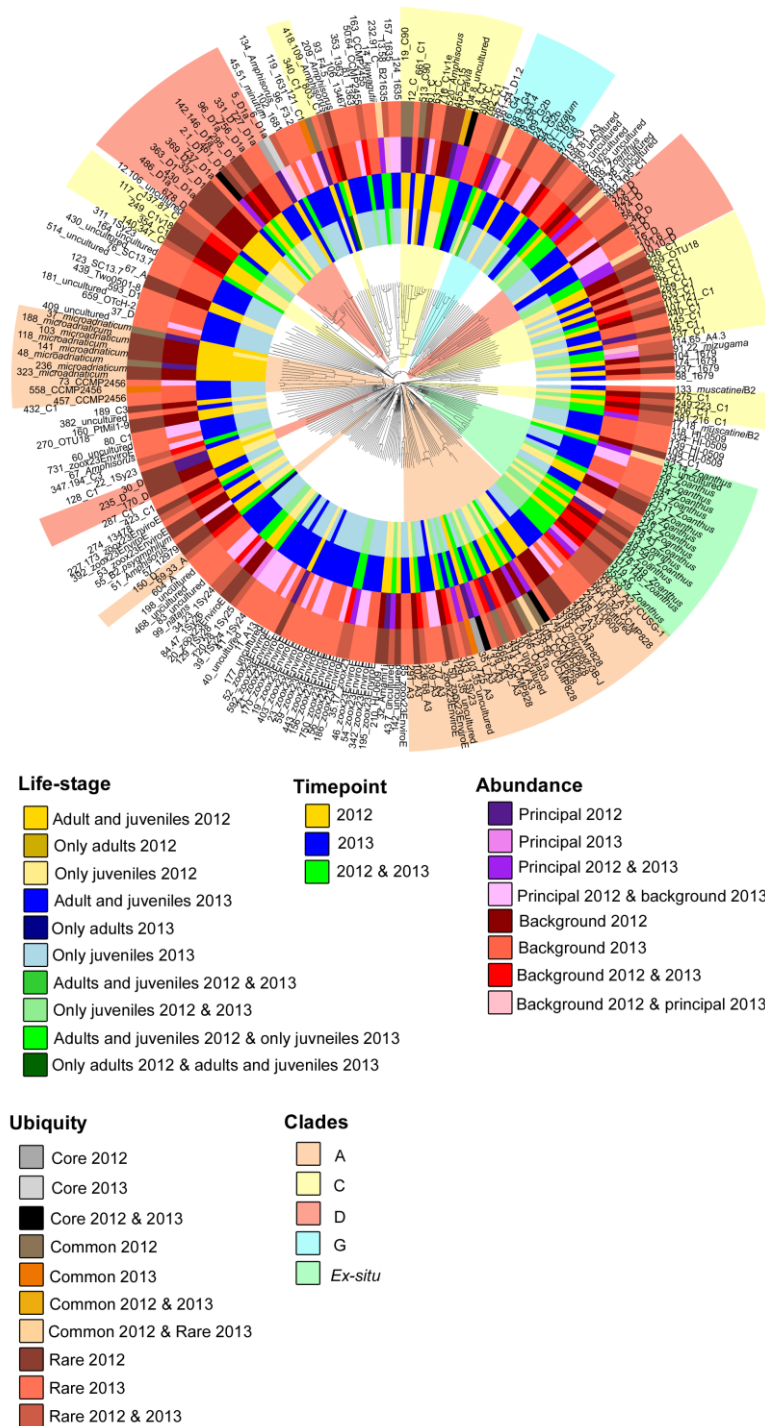

157

158

159 **Figure 1.** Fan dendrogram of 261 *Symbiodinium* ITS-2 OTUs retrieved from *Acropora tenuis*  
 160 juveniles and adults in 2012 and 2013. The Neighbour-Joining dendrogram was constructed  
 161 using raw APE alignments of only those OTUs that were retrieved from three or more  
 162 samples (134/422 OTUs in 2012 and 181/568 OTUs in 2013). Concentric circles from  
 163 innermost to the outermost position represent OTUs present: 1) life-stage, 2) year, 3)  
 164 normalized abundance (principal: > 0.01%, background < 0.01%), 4) ubiquity (Core: >75%  
 165 of samples, Common: 25-75%, Rare: < 25%). Semi-transparent backgrounds represent clade  
 166 designations of individual OTUs.

167

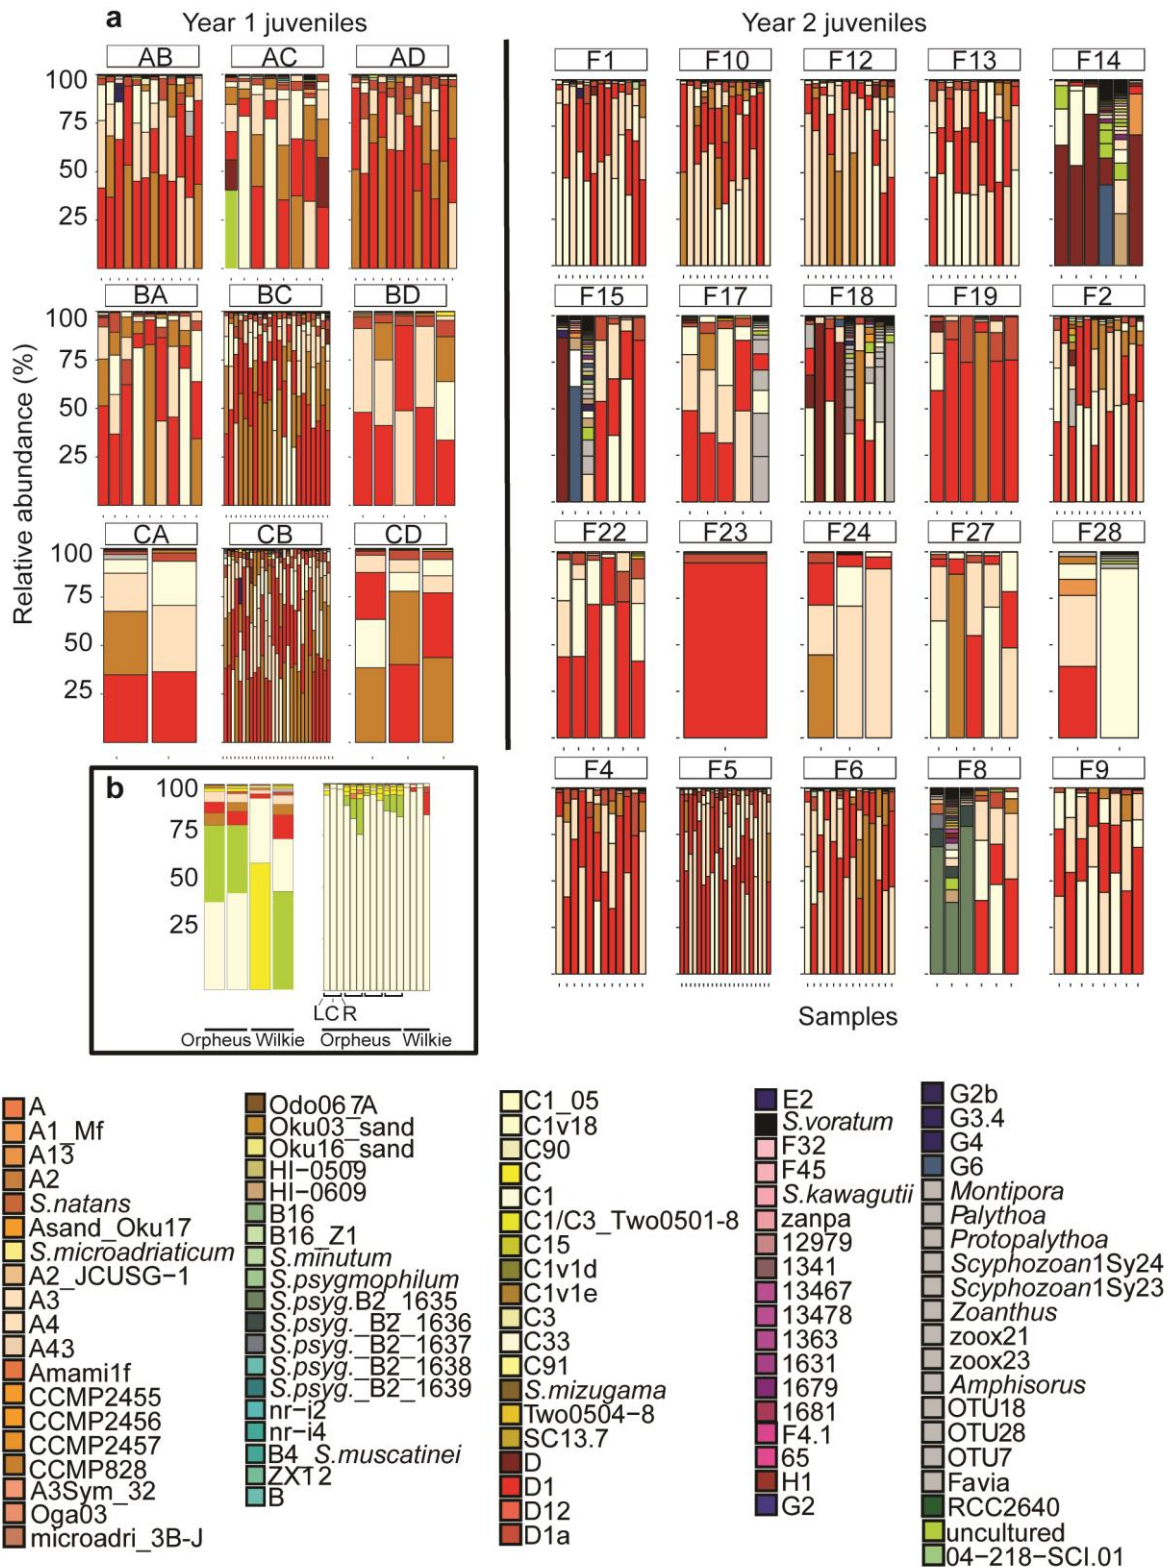

168

169

170 **Figure 2.** Barplots of variance-normalized abundances of *Symbiodinium* diversity associated

171 with (a) juveniles and (b) adults of *Acropora tenuis* used in 2012 (Year 1) and 2013 (Year 2)

172 crosses. Colours represent different *Symbiodinium* types. Origins of parent colonies are

173 Orpheus and Wilkie reefs. *A. tenuis* adult colonies from Orpheus used for 2013 crosses

174 included samples that were sequenced that represent the left side of the colony (L), center of

175 the colony (C), and right side of the colony (R) to examine intra-colony *Symbiodinium*

176 diversity.



176 ***Symbiodinium* communities associated with *Montipora digitata***

177           101 OTUs were found in *M. digitata* eggs and adults, with on average 7 ( $\pm 0.9$  SE)  
178 OTUs per egg and 5.3 ( $\pm 0.9$  SE) OTUs per adult. The highest diversities of OTUs were  
179 retrieved from clades A (73 OTUs) and C (18 OTUs), whereas D and *ex-situ* types each had  
180 three OTUs represented (Fig. 3). 99.1% of the total cleaned reads belonged to C15 (OTU1),  
181 with this type making up 98.8 % ( $\pm 0.5$  SE) and 99 % ( $\pm 0.1$  SE) of all reads retrieved from  
182 dams and eggs, respectively. The next most abundant OTUs were an *ex-situ* *Amphisorus*  
183 identified OTU (potentially another C15 type), D1, A3, and two other A types (A and  
184 CCMP828) (Fig. 4). Adults could generally be distinguished from eggs by the unique  
185 presence of A2, A3, HA3-5, C1\_8, G3 (Fig. 3) and a greater proportional abundance of a type  
186 A symbiont (OTU4) in dams 29, 32, 7, 8 and 9 (Fig. 4). Of these five unique adult OTUs,  
187 none were found in more than two adult colonies. Eighty-two OTUs were found in eggs but  
188 not adults and 43 of these were found in three or more eggs, and a majority were uncultured  
189 types at background levels from the eggs of dam 29 (Fig. 3). Both inter- and intra- family  
190 variation in background *Symbiodinium* OTU composition and abundance were detected  
191 within eggs as well (further description in supplementary results, Supplementary Fig. S2,  
192 Supplementary Table S6).

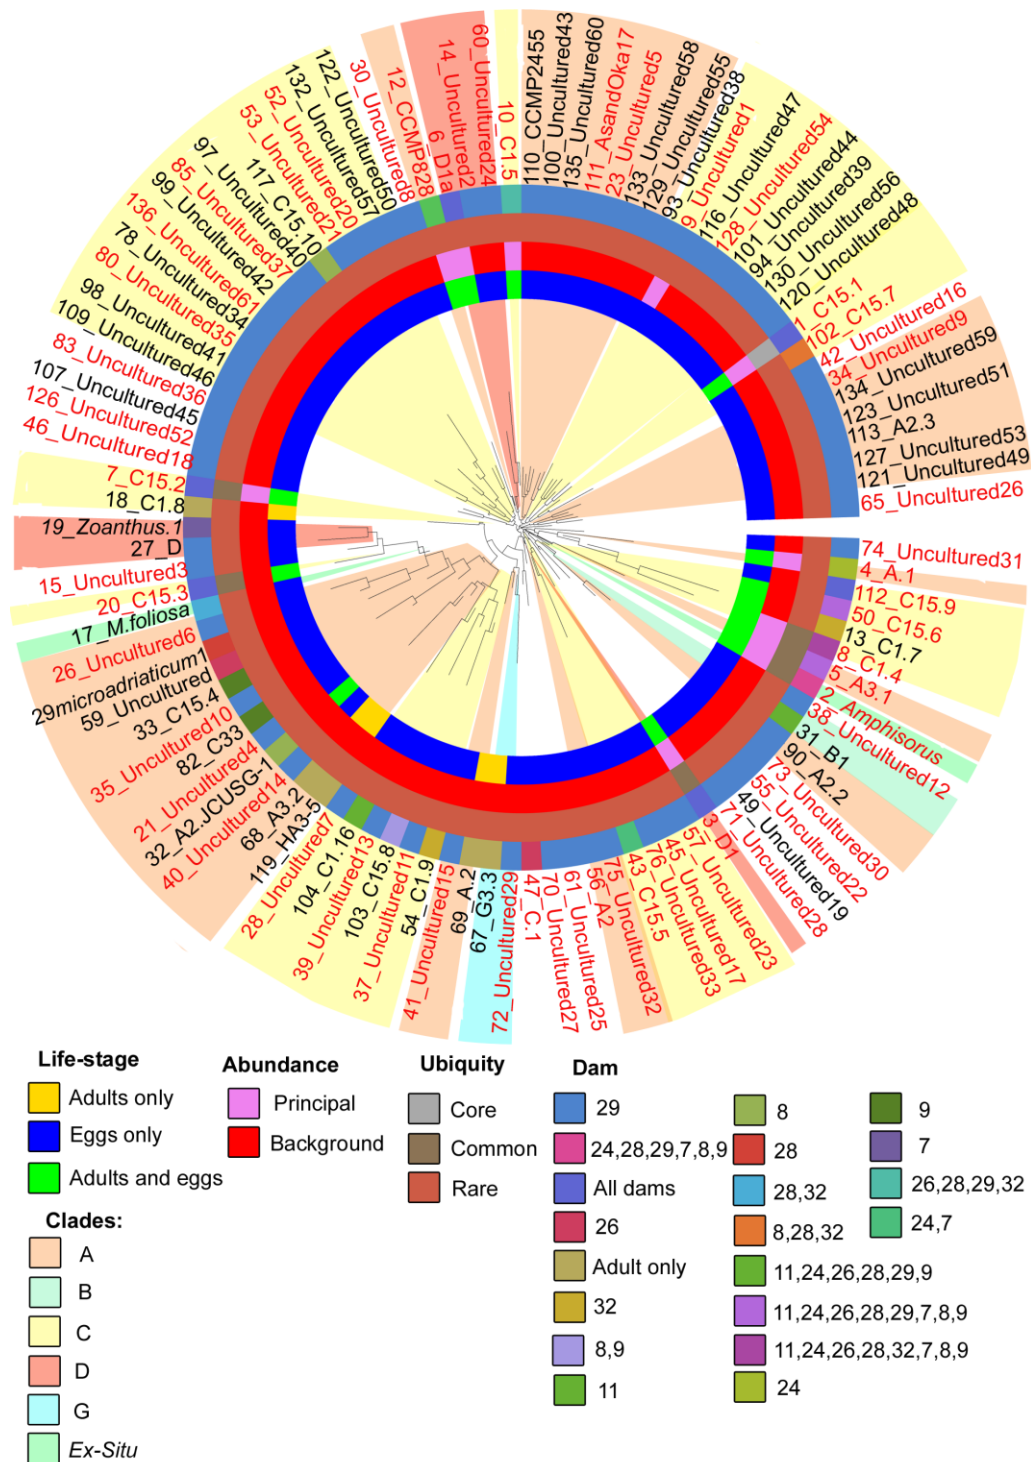

193

194 **Figure 3.** Fan dendrogram of 101 *Symbiodinium* ITS-2 OTUs retrieved from *Montipora*  
 195 *digitata* eggs and adults. The Neighbour-Joining dendrogram was constructed using raw APE  
 196 alignments. Concentric circles from innermost to the outermost position represent OTUs  
 197 present: 1) life-stage, 2) normalized abundance (principal: > 0.01%, background < 0.01%), 3)  
 198 ubiquity (Core: >75% of samples, Common: 25-75%, Rare: < 25%), and 4) dam identity.  
 199 Semi-transparent backgrounds represent clade designations of individual OTUs. Red text  
 200 indicates OTUs that were found in three or more eggs.

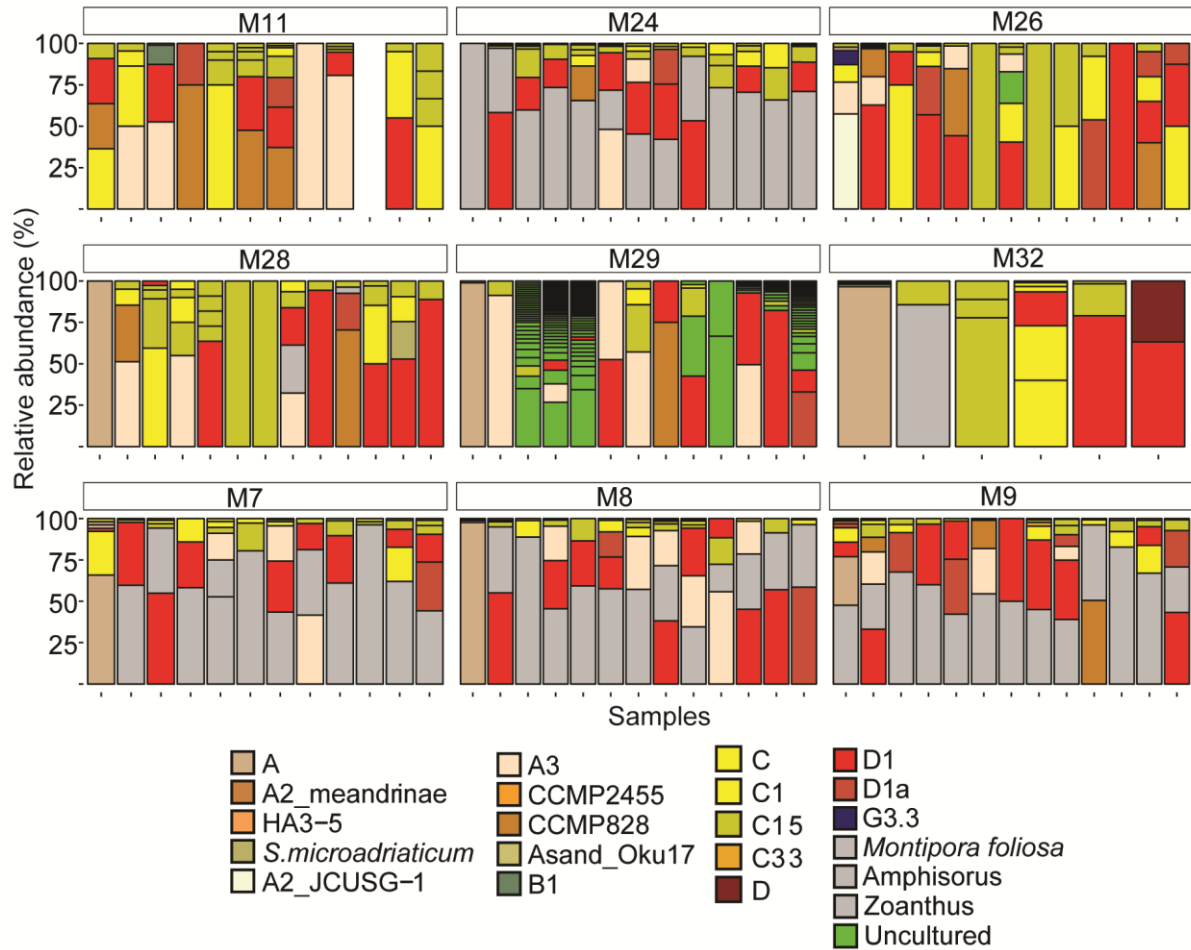

208 **Narrow-sense heritability of *Symbiodinium* community in *A. tenuis* juveniles and *M.***  
209 ***digitata* eggs**

210 Bayesian linear mixed models, and specifically, the animal model, were used to  
211 estimate relatedness-based heritability as they are robust to unbalanced designs. Furthermore,  
212 the animal model utilizes all levels of relatedness between individuals in a given dataset, and  
213 not just parent-offspring comparisons, thus giving it greater power for data collected in field  
214 studies<sup>36</sup>. The Bayesian narrow-sense heritability estimate ( $h^2$ ) of the *Symbiodinium*  
215 community in *A. tenuis* juveniles was 0.29, with a 95% Bayesian credibility interval for the  
216 additive genetic component of 0.06-0.86. The mean heritability was 0.36 ( $\pm 0.21$  SD) (Table  
217 1). The high density of estimates between 0.2 - 0.4 within the posterior distribution of  $h^2$   
218 suggests high statistical support around 0.29 despite the credibility interval being very large.  
219 The maternal transfer of *Symbiodinium* in the broadcast spawning coral *M. digitata* had a  
220 narrow-sense heritability estimate of 0.62 (0.27-0.86 95% Bayesian credibility interval), with  
221 a mean heritability of 0.57 ( $\pm 0.16$  SD) (Table 1). We did not detect an effect of maternal  
222 environment on similarities in *Symbiodinium* diversity among eggs or among juveniles.  
223 Models that included maternal effects arising from eggs developing in a shared environment  
224 (maternal environmental effects for both *A. tenuis* and *M. digitata*) were not significantly  
225 better than those that did not include maternal effects (DIC no effects < DIC maternal  
226 environmental effects included).

227 Mid-parent regression estimates for the 29 *A. tenuis* families from 2012 and 2013  
228 indicated that trait-based  $h^2$  of the *Symbiodinium* community was 0.3 (Supplementary Fig.  
229 S3). Parent-offspring regression of the 99 *M. digitata* eggs genotyped from nine dams  
230 resulted in a heritability estimate of 0.156 (slope = 0.078 x 2 as a single parent)  
231 (Supplementary Fig. S4). Therefore, 30% and 16% of the measured variation in the  
232 *Symbiodinium* community in *A. tenuis* and *M. digitata*, respectively, was due to genetic  
233 differences between offspring.

234

235

236

237

238

239

240

241 **Table 1.** Summary of the narrow-sense heritability estimates obtained for *A. tenuis* and *M.*  
 242 *digitata* in this study using relatedness and trait-based heritability methods.

243

| Symbiont acquisition mode | Heritability estimation method: | Relatedness-based (Bayesian) |                                   |              | Trait-based (regression) |               |
|---------------------------|---------------------------------|------------------------------|-----------------------------------|--------------|--------------------------|---------------|
|                           |                                 | $h^2$ (mode)                 | 95% Bayesian credibility interval | $h^2$ (mean) | $\pm$ SD                 | $h^2$ (slope) |
| Environmental             | <i>A. tenuis</i>                | 0.29                         | 0.06-0.86                         | 0.36         | 0.21                     | 0.30          |
| Maternal                  | <i>M. digitata</i>              | 0.62                         | 0.27-0.86                         | 0.57         | 0.16                     | 0.16          |

244

## 245 Discussion

246 Substantial heritability of the *Symbiodinium* community in both vertically- and  
 247 horizontally-transmitting corals highlights the important role of host genetics in governing  
 248 the composition of symbiont communities within their tissues. Surprisingly, mean Bayesian  
 249 heritability estimates for *Symbiodinium* communities associated with juveniles of *Acropora*  
 250 *tenuis* were high (0.29) given expected low levels of fidelity for species with  
 251 environmentally-acquired symbionts. Conversely, heritability estimates associated with eggs  
 252 of *Montipora digitata* were low (0.62) given the high levels of fidelity expected for  
 253 vertically-transmitted symbionts. Although our results differed from expectations of fidelity  
 254 and heritability based on current transmission paradigms in corals, they are consistent with  
 255 studies that have demonstrated the host genetic role in governing the composition of  
 256 symbiotic bacterial communities in mammals, insects and other cnidarians<sup>37-40</sup>, as well as the  
 257 abundance of bacteria in insects<sup>41</sup> and humans<sup>42</sup>. Furthermore, these estimates are consistent  
 258 with the characteristic hallmarks of host-controlled symbiont regulation. For example,  
 259 *Symbiodinium* cells are enveloped in a host-derived symbiosome, with only a few (2-8)  
 260 symbiont cells per host membrane<sup>43</sup>. This indicates that the coral host regulates  
 261 *Symbiodinium* on an almost individual cell basis, facilitating overall population regulation<sup>41</sup>  
 262 and potentially community composition within the holobiont. Thus, it is likely advantageous  
 263 for the host's molecular architecture governing the *Symbiodinium* community to be passed  
 264 from one generation to the next. Importantly, the partial genetic regulation in *Symbiodinium*  
 265 communities found here suggests that there is potential for the symbioses to evolve and adapt  
 266 and therefore potentially develop 'optimal' symbiont-host partnerships under changing  
 267 environmental conditions.

268 Our results provide the first in-depth picture of the complexity of the *Symbiodinium*  
269 community in *A. tenuis* juveniles during the initial month of uptake. No juveniles exclusively  
270 hosted a single clade or type, a result corroborated by lab and other field-based experiments  
271 <sup>44–49</sup>. Moreover, although the diversity measured here was much greater than those reported  
272 in these previous studies; we found strong temporal stability in OTU diversity and  
273 abundances between the two years. Therefore, the unexpectedly high fidelity of the symbiont  
274 community in conjunction with our heritability estimates suggests strong host genotype –  
275 symbiont community associations, a result also implicated in studies comparing symbiosis  
276 prevalence across phylogenetic relationships in *Hydra*, wasps, and primates <sup>30</sup>. Further work  
277 is needed to map the *Symbiodinium* diversity in juvenile corals as well as elucidate the  
278 molecular mechanisms regulating the establishment of this symbiosis.

279 The strong temporal stability in the relative proportions and numbers of OTUs at  
280 principal and background levels suggests that the genetic regulation governing the  
281 *Symbiodinium* community extends to OTUs found at very low abundance. Although their  
282 significance for juvenile physiology is currently unclear, *Symbiodinium* at background  
283 abundances in adults are central to coral health. For example, fine scale dynamics of  
284 *Symbiodinium* communities (i.e., changes in relative abundance and/or diversity of only a  
285 fraction of types) impact host bleaching susceptibility, recovery and physiology <sup>27,50</sup>.  
286 Although background types are likely to have a negligible effect compared to principal types  
287 like A3, C1, and D1 when corals are healthy, they may increase in importance when  
288 environmental conditions are sub-optimal. On the other hand, the presence of many low-  
289 abundance types may have negative fitness outcomes for coral juveniles if they reflect the  
290 inability of the coral host to maintain stable symbioses with beneficial types. This hypothesis  
291 is supported by our observation of a correlation between *Symbiodinium* diversity and juvenile  
292 mortality among particular coral families <sup>51</sup> and suggests that these high-mortality families  
293 had lost the ability to regulate community diversity, leading to a proliferation of potentially  
294 opportunistic types. This proliferation of initially low abundance types could represent  
295 dysbiosis of symbiotic communities, which is known to lead to disease in human populations  
296 <sup>52,53</sup> and could also impact coral health outcomes.

297 The heritable signal found for *Symbiodinium* communities associated with eggs of the  
298 vertically-transmitting coral *M. digitata* was strong (62%), but fidelity was less than expected  
299 given that eggs acquire *Symbiodinium* communities in the maternal environment. Despite  
300 *Symbiodinium* C15 dominating symbiont communities in both eggs and dams, maternal  
301 transfer lacked precision in one dam in particular (dam 29), whose eggs had highly variable

302 *Symbiodinium* communities that included uncultured OTUs, similar to previous reports from  
303 this coral genus<sup>54</sup>. There are many precedents for inexact maternal transfer of symbiont  
304 communities, and studies on insects show that vertical transmission is rarely perfect<sup>55</sup> due to  
305 symbiont competition within hosts<sup>56</sup>. Such imprecision in maternal transfer is a derivative of  
306 fitness costs associated with the maintenance of superinfections (stable coexistence of  
307 multiple symbionts) and can be overcome if selection for coexistence is greater than the costs  
308 of its maintenance. Superinfections may provide a diversity of beneficial symbiont traits. For  
309 example, different symbionts provide different nutrients to the host insects<sup>57</sup>. For *M. digitata*,  
310 imprecision may represent a bet-hedging strategy to maximise the likelihood that some  
311 offspring will survive when eggs are dispersed and encounter environments that are different  
312 to their parents. This variation also highlights the potential flexibility of the *M. digitata*-  
313 *Symbiodinium* symbiosis, which may enable the host to vary its symbiotic partnerships in  
314 response to environmental change by benefitting from new host-symbiont combinations.

315 Surprisingly, much of the diversity found in *M. digitata* eggs was not present in parent  
316 colonies, a result previously observed in larvae of the brooding, vertically-transmitting coral  
317 *Seriatopora hystrix* (Quigley et al. *in-review*) and between *A. tenuis* juveniles and adults (this  
318 study). This suggests that eggs are acquiring symbionts from sources external to the maternal  
319 transmission process. Mixed systems involving both vertical and horizontal transmission are  
320 known (e.g. bacteria in clams; reviewed in<sup>30</sup> and have recently been demonstrated in  
321 brooding corals (Quigley et al. *in-review*). The cellular machinery needed for recognition of  
322 appropriate *Symbiodinium* types<sup>43</sup> would not be developed in the egg cytoplasm, where  
323 *Symbiodinium* are present pre-fertilization<sup>58</sup>. Therefore, eggs exposed to transient symbionts  
324 in the dam's gastrovascular cavity or by parasitic *Symbiodinium*-containing vectors (e.g.  
325 ciliates<sup>59</sup>; symbiont transmission by parasitic vectors: reviewed in<sup>56</sup>), may retain these  
326 communities until recognition systems of eggs, larvae or juveniles mature. Interestingly, one  
327 type (OTU111) found in three eggs from dam 29 were identified as a free-living A type  
328 recovered from Japanese marine sediments (EU106364,<sup>60</sup>), suggesting that these OTUs  
329 represent non-symbiotic, potentially opportunistic symbionts. Further work is needed to  
330 determine what potential ecological role these symbionts fulfil.

331 Maternal environmental effects, such as lipid contributions by dams, have well known  
332 effects on the early life stages of many marine organisms<sup>61</sup>. However, our Bayesian models  
333 were not significantly improved with the addition of dam identity, suggesting that significant  
334 heritability estimates are attributable to genetic effects and not due to maternal environmental  
335 effects<sup>36</sup> or cytoplasmic inheritance<sup>62</sup>. Whilst we can only speculate about the exact

336 mechanisms that are being inherited by offspring, likely candidates include those involved in  
337 recognition and immunity pathways<sup>43</sup>, with cell-surface proteins playing an important role in  
338 the selection of specific *Symbiodinium* strains by coral hosts<sup>63–65</sup>. For example, these may  
339 include Tachylectin-2-like lectins, which have been implicated in the acquisition of A3 and a  
340 D-type in *A. tenuis*<sup>44,66,67</sup>. Indeed, suppression or modification of the immune response has  
341 often been implicated in the formation of the *Symbiodinium*-cnidarian partnership<sup>43,68,69</sup>.

342 Although this has not yet been demonstrated in corals, human studies have shown that  
343 immune system characteristics underpin heritable components of the genome<sup>70</sup> and at least  
344 151 heritable immunity traits have been characterized, including 22 cell-surface proteins<sup>71</sup>.

345 Similarly, the juvenile coral may be primed to take up specific *Symbiodinium* types  
346 through the transfer of genetic machinery that results in a bi-product(s) to ensure the juvenile  
347 is colonized by beneficial types and prevents colonization by unfavourable symbionts  
348 through competitive exclusion (e.g., maternal imprinting controlled by offspring loci<sup>62</sup>).  
349 Such bi-products may be akin to amino acids, which have been shown to regulate the  
350 abundances of *Symbiodinium* populations<sup>72</sup>. Sugars have also been found to influence  
351 bacterial communities in corals<sup>73</sup> and may have similar roles in regulating *Symbiodinium*  
352 communities. Trehalose, in particular, has been identified as an important chemical attractant  
353 between *Symbiodinium* and coral larvae and may help to regulate the early stages of  
354 symbiosis<sup>74</sup>. Human studies also provide examples of sugars (both maternal and offspring  
355 derived) that make infant intestines less habitable for harmful bacteria, setting up conditions  
356 for preferential colonization by favourable bacteria<sup>75</sup>. Bacterial diversity in cnidarian hosts  
357 can also be modulated through the production of antimicrobial peptides<sup>37</sup> and bacterial  
358 quorum sensing behaviour<sup>76</sup>. Although neither of these mechanisms have been explored in  
359 corals, similar host/symbiont bi-products may be influential in the regulation of  
360 *Symbiodinium* communities.

361 In conclusion, the results presented here provide new insights into the role of host  
362 genetics and inheritance in governing *Symbiodinium* communities in corals. This information  
363 is crucial for understanding factors governing coral health and fitness under stress conditions  
364 (i.e. bleaching risk), as well as the potential for host-symbiont partnerships to evolve.  
365 Variability in the symbiont community within and among families and evidence that that  
366 variation is heritable supports the likelihood that adaptive change is possible in this important  
367 symbiotic community. These results will also aid in the development of active reef restoration  
368 methods focused on the assisted evolution of hosts and symbionts as they take advantage of  
369 the link between genetic mechanisms and desired phenotypes, in which targeted traits with



370 moderate to high heritability increase the efficacy of breeding schemes. Adaptive change  
371 through heritable variation of symbionts is therefore another mechanism that corals may use  
372 to contend with current and future stressors, such as climate change.

373

## 374 **Materials and Methods**

### 375 **Experimental breeding design and sample collection**

376 For crossing experiments, gravid colonies of the horizontally-transmitting broadcast-  
377 spawning coral *Acropora tenuis* were collected in 2012 and 2013 from the northern (Princess  
378 Charlotte Bay (PCB): 13°46'44.544"S, 143°38'26.0154"E) and central Great Barrier Reef  
379 (GBR) (Orpheus Island: 18°39'49.62"S, 146°29'47.26"E).

380 In 2012, nine families of larvae were produced by crossing gametes from four corals  
381 (OI: A-B, PCB: C-D) on 2 December following published methods<sup>51</sup>. The nine gamete  
382 crosses excluded self-crosses (Supplementary Table S1). Larvae were stocked at a density of  
383 0.5 larvae per ml in one static culture vessels per family in a temperature-controlled room set  
384 at 27°C (ambient seawater temperature). Water was changed one day after fertilization and  
385 every two days thereafter with 1 µM filtered seawater at ambient temperature. To induce  
386 settlement, 25 settlement surfaces (colour-coded glass slides) were added to each larval  
387 culture vessel six days post-fertilization, along with chips of ground and autoclaved crustose  
388 coralline algae (CCA, *Porolithon onkodes* collected from SE Pelorus: 18°33'34.87"S,  
389 146°30'4.87"E). The number of settled juveniles was quantified for each family, and then  
390 placed randomly within and among the three slide racks sealed with gutter guard mesh. The  
391 racks were affixed to star pickets above the sediments in Little Pioneer Bay (18°36'06.2"S,  
392 146°29'19.1"E) 11 days post fertilization. Slide racks were collected 29 days later (11  
393 January 2013), after which natural infection by *Symbiodinium* had occurred. Juveniles from  
394 each cross were sampled (n = 6 - 240 juveniles/family, depending on survival rates), fixed in  
395 100% ethanol and stored at -20°C.

396 In 2013, 25 families were produced from gamete crosses among eight parental  
397 colonies: four from PCB and four from Orpheus Island (full details of colony collection,  
398 spawning, crossing and juvenile rearing in<sup>51</sup> (Supplementary Table S2). Larvae were raised  
399 in three replicate cultures per family. Settlement was induced by placing autoclaved chips of  
400 CCA onto settlement surfaces, which were either glass slides, calcium carbonate plugs or the  
401 bottom of the plastic culturing vessel. Settlement surfaces with attached juveniles were  
402 deployed randomly to the same location in Little Pioneer Bay as in 2012 19 days post

403 fertilization and collected 26 days later. Samples of juveniles (n = 1 - 194 juveniles per  
404 family) were preserved and stored as in 2012.

405 Thirty-two gravid colonies of the vertically-transmitting broadcast spawner  
406 *Montipora digitata* were collected from Hazard Bay (S18°38.069', E146°29.781') and  
407 Pioneer Bay (S18°36.625', E146°29.430') at Orpheus Island on the 30<sup>th</sup> of March and 1<sup>st</sup> of  
408 April 2015. Colonies were placed in constant-flow, 0.5 µM filtered seawater in outdoor  
409 raceways at Orpheus Island Research Station. Egg-sperm bundles were collected from a total  
410 of nine different colonies on the 4<sup>th</sup> and 5<sup>th</sup> of April, separated with a 100 µm mesh and rinsed  
411 three times. Individual eggs and adult tissue samples were then placed in 100% ethanol and  
412 stored at -20°C until processing.

413

#### 414 **Sequencing of *Symbiodinium* ITS-2 in egg, juvenile and adult coral samples**

415 The number of juveniles of *A. tenuis* sequenced from each of the 9 crosses in 2012  
416 ranged from 2 - 29 individuals (average ± SE: 11.3 ± 3) (Supplementary Table S1) and a  
417 single sample from each parental colony was sequenced concurrently. In 2013, 1 - 21 *A.*  
418 *tenuis* juveniles (average ± SE: 8.6 ± 1) were sequenced from each of the 20 families (of the  
419 original 25) that survived field deployment (Supplementary Table S2). The adult samples  
420 sequenced included three samples per colony from Orpheus parents (from the edges and  
421 center of each colony) and one sample per colony for Wilkie parents. For *M. digitata*, 5 - 12  
422 eggs per dam were sequenced, along with one sample per maternal colony.

423 DNA was extracted from juveniles of *A. tenuis* in 2012 and 2013 with a SDS method  
424 <sup>51</sup>. For *M. digitata*, single egg extractions used the same extraction buffers and bead beating  
425 steps as described in <sup>51</sup>, although without the subsequent washes and precipitation steps  
426 because of the small tissue volumes of single eggs <sup>77</sup>. Library preparation, sequencing and  
427 data analysis were performed separately for 2012 and 2013 samples of *A. tenuis* and *M.*  
428 *digitata*, as described in <sup>51</sup>. Briefly, the USEARCH pipeline (v. 7) <sup>78</sup> and custom-built  
429 database of all *Symbiodinium*-specific NCBI sequences were used to classify reads <sup>79,80</sup>, with  
430 blast hits above an E-value threshold of 0.001 removed, as they likely represented non-  
431 specific amplification of other closely-related species within the Dinoflagellata phylum  
432 (Supplementary Table S3). Analysis of rarefaction curves suggested that differences in  
433 sequencing depth across samples did not affect diversity estimates (additional description in  
434 supplementary methods).

435

#### 436 **Data analysis and visualization**

437 Fan dendrograms were constructed using a raw alignment function and neighbour  
438 joining tree algorithm from the ‘ape’ package<sup>81</sup>. Sample metadata were mapped onto trees  
439 using the package ‘diverstreet’<sup>82</sup>. To aid in visualizing the phylogenetic relationships on the *A*  
440 *tenuis* tree, only OTUs that were found within at least three samples were kept, reducing the  
441 total OTU count from 422 to 134 for 2012 samples and from 568 to 181 for 2013 samples,  
442 giving an overall total of 315 OTUs for *A. tenuis*. To determine the overlap in *Symbiodinium*  
443 OTUs from *A. tenuis* data between years that were clustered and mapped separately, the 315  
444 OTUs were aligned in Clustal OMEGA<sup>83</sup>. OTUs that clustered and Blasted to the same  
445 accession number (54 of the 315) were deemed to be the same OTU, resulting in a total of  
446 261 distinct OTUs. In total, 80 unique OTUs were found in 2012, 127 were found in 2013,  
447 and 54 were shared between years. OTUs with a relative normalized abundance of less than  
448 0.01% were classified as “background”, whilst those with abundances greater than 0.01%  
449 were considered “principal.” OTUs were further classified by ubiquity across samples and  
450 “core” OTUs were found in >75% of samples, “common” were found in 25 -75% of samples  
451 and “rare” were found in < 25%. As far fewer OTUs were recovered from *M. digitata*  
452 samples, all 101 OTUs were visualized and classified by abundance and ubiquity as described  
453 above. Differential abundance testing was performed with ‘DESeq2’, with Benjamini-  
454 Hochberg p-adjusted values at 0.05<sup>84-86</sup>. Networks and heatmaps were constructed using un-  
455 weighted Unifrac distances of the normalized *Symbiodinium* abundances in eggs only, where  
456 maximum distances were set at 0.4.

457

## 458 **Heritability analyses**

459 The *Symbiodinium* community associated with each adult, juvenile or egg of the two  
460 coral species was characterized as a continuous quantitative trait by converting community  
461 composition into a single diversity metric, as detailed in Quigley et al. *in-review*. Collapsing  
462 complex assemblage data into a single diversity value (local diversity measure)<sup>87</sup> was  
463 necessary to apply a univariate heritability statistic. The Leinster and Cobbold diversity  
464 metric incorporates variance-normalized OTU abundances from linear models using negative  
465 binomial distributions, OTU sequence diversity, and OTU rarity<sup>87</sup>. Incorporating both  
466 abundance and diversity of *Symbiodinium* types into heritability estimates is essential because  
467 changes in *Symbiodinium* community abundance dynamics can change the functional output  
468 of the symbiosis as a whole<sup>27</sup> and are important in determining coral resilience and bleaching  
469 susceptibility<sup>26,88,89</sup>.

470

471 **Regression-based estimates of heritability:** Phenotypic values of offspring can be regressed  
472 against parental midpoint (average) phenotypic values, with the slope being equal to the  
473 narrow-sense heritability of the trait of interest <sup>32,33</sup>. Parental midpoint values were calculated  
474 by taking the average of the dam and sire *Symbiodinium* diversities for each family and then  
475 regressed against diversity values for the offspring of each family. Precision of the  
476 heritability estimate increases when parents vary substantially in the trait of interest <sup>32</sup>. Coral  
477 colonies dominated by a single or mixed *Symbiodinium* communities (C, D, C/D  
478 communities) can be considered biological extremes and ample evidence describes their  
479 contrasting physiological impacts on coral hosts (i.e., growth, bleaching) when associated  
480 with D versus C communities in particular <sup>27</sup>. Therefore, parental colonies selected for  
481 breeding were dominated by C1 (families W5, 10) or had mixed communities of C1/D1  
482 (W7), C1/D1/D1a (W11, PCB4, 6, 8, 9), or multiple A, C1 and D types (OI3, 4, 5, 6) (Fig.  
483 2b).

484

485 **Bayesian linear mixed model estimates of heritability:** Heritability estimates were derived  
486 from estimates of additive genetic variance calculated from the ‘animal model,’ a type of  
487 quantitative genetic mixed effects model incorporating fixed and random effects, and  
488 relatedness coefficients amongst individuals <sup>90</sup>. The animal model was implemented using  
489 Bayesian statistics with the package ‘MCMCglmm’ <sup>91</sup>. The model incorporated the diversity  
490 metric calculated for each juvenile and the pedigree coefficient of relatedness as random  
491 effects. Bayesian heritability models were run with  $1.5 \times 10^6$  iterations, a thinning level of 800  
492 (*A. tenuis*) or 250 (*M. digitata*), and a burn-in of 10% of the total iterations. A non-  
493 informative flat prior specification was used, following an inverse gamma distribution <sup>36</sup>.  
494 Assumptions of chain mixing, normality of posterior distributions and autocorrelation were  
495 met. The posterior heritability was calculated by dividing the model variance attributed to  
496 relatedness by the sum of additive and residual variance. The impact of environmental  
497 covariance ( $V_{EC}$ ) was reduced by randomly placing families within the outplant area <sup>32</sup>.  
498 Maternal environmental effects were assessed and were not significant for either *A. tenuis* or  
499 *M. digitata*, based on Deviance Information Criteria (DIC) from Bayesian models <sup>36</sup>. The  
500 influence of different settlement surface for *A. tenuis* juveniles in 2013 was assessed using  
501 linear mixed models (fixed effect: substrate, random effect: family) in the ‘nlme’ package <sup>92</sup>  
502 using the first principal component extracted from PCoA plots incorporating weighted  
503 Unifrac distances of normalized *Symbiodinium* abundances for juveniles. Model assumptions  
504 of homogeneity of variance, normality, and linearity were met. Substrate type did not

505 significantly explain *Symbiodinium* community differences among samples (LME:  $F_{(4)} = 1.05$ ,  
506  $p = 0.38$ ).

507

## 508 **References**

- 509 1. Hoegh-Guldberg, O. Climate change, coral bleaching and the future of the world's  
510 coral reefs. *Aust. J. Mar. Freshw. Res.* **50**, 839–866 (1999).
- 511 2. Eakin, C. M., Lough, J. M. & Heron, S. F. in *Coral bleaching* 41–67 (Springer, 2009).
- 512 3. Glynn, P. W. Coral reef bleaching: ecological perspectives. *Coral Reefs* **12**, 1–17  
513 (1993).
- 514 4. Normile, D. El Niño's warmth devastating reefs worldwide. *Science (80)*. **352**, 15–16  
515 (2016).
- 516 5. Charmantier, A., Garant, D. & Kruuk, L. E. B. *Quantitative genetics in the wild*. (OUP  
517 Oxford, 2014).
- 518 6. Hughes, T. P. *et al.* Climate change, human impacts, and the resilience of coral reefs.  
519 *Science (80)*. **301**, 929–933 (2003).
- 520 7. Dixon, G. B. *et al.* Genomic determinants of coral heat tolerance across latitudes.  
521 *Science (80)*. **348**, 1460–1462 (2015).
- 522 8. Jin, Y. K. *et al.* Genetic markers for antioxidant capacity in a reef-building coral. *Sci.*  
523 *Adv.* **2**, (2016).
- 524 9. Salih, A., Larkum, A., Cox, G., Kühl, M. & Hoegh-Guldberg, O. Fluorescent pigments  
525 in corals are photoprotective. *Nature* **408**, 850–853 (2000).
- 526 10. Baird, A. H., Bhagooli, R., Ralph, P. J. & Takahashi, S. Coral bleaching: the role of  
527 the host. *Trends Ecol. Evol.* **24**, 16–20 (2009).
- 528 11. Glynn, P. W., Mate, J. L., Baker, A. C. & Calderon, M. O. Coral bleaching and  
529 mortality in Panama and Ecuador during the 1997-1998 El Nino Southern Oscillation  
530 event: spatial/temporal patterns and comparisons with the 1982-1983 event. *Bull. Mar.*  
531 *Sci.* **69**, 79–109 (2001).
- 532 12. Bieri, T., Onishi, M., Xiang, T., Grossman, A. R. & Pringle, J. R. Relative  
533 contributions of various cellular mechanisms to loss of algae during cnidarian  
534 bleaching. *PLoS One* **11**, e0152693 (2016).
- 535 13. Van Oppen, M. J. H., Souter, P., Howells, E. J., Heyward, A. & Berkelmans, R. Novel  
536 genetic diversity through somatic mutations: fuel for adaptation of reef corals?  
537 *Diversity* **3**, 405–423 (2011).
- 538 14. Fellous, S., Duron, O. & Rousset, F. Adaptation due to symbionts and conflicts

- 539 between heritable agents of biological information. *Nat. Rev. Genet.* **12**, 663 (2011).
- 540 15. LaJeunesse, T. C. *et al.* Host–symbiont recombination versus natural selection in the  
541 response of coral–dinoflagellate symbioses to environmental disturbance. *Proc. R. Soc.*  
542 *B Biol. Sci.* **277**, 2925–2934 (2010).
- 543 16. Pochon, X., Putnam, H., Burki, F. & Gates, R. Identifying and characterizing  
544 alternative molecular markers for the symbiotic and free-living dinoflagellate genus  
545 *Symbiodinium*. *PLoS One* **7**, e29816 (2012).
- 546 17. Baker, A. C. Flexibility and specificity in coral-algal symbiosis: Diversity, ecology,  
547 and biogeography of *Symbiodinium*. *Annu. Rev. Ecol. Evol. Syst.* **34**, 661–689 (2003).
- 548 18. Quigley, K. M. *et al.* Deep-sequencing method for quantifying background abundances  
549 of *Symbiodinium* types: exploring the rare *Symbiodinium* biosphere in reef-building  
550 corals. *PLoS One* **9**, e94297 (2014).
- 551 19. Arif, C. *et al.* Assessing *Symbiodinium* diversity in scleractinian corals via Next  
552 Generation Sequencing based genotyping of the ITS2 rDNA region. *Mol. Ecol.* **23**,  
553 4418–4433 (2014).
- 554 20. Boulotte, N. M. *et al.* Exploring the *Symbiodinium* rare biosphere provides evidence  
555 for symbiont switching in reef-building corals. *ISME J.* (2016).
- 556 21. Kenkel, C. D., Setta, S. P. & Matz, M. V. Heritable differences in fitness-related traits  
557 among populations of the mustard hill coral, *Porites astreoides*. *Heredity (Edinb)*. **115**,  
558 509–516 (2015).
- 559 22. Fabina, N. S., Putnam, H. M., Franklin, E. C., Stat, M. & Gates, R. D. Symbiotic  
560 specificity, association patterns, and function determine community responses to  
561 global changes: defining critical research areas for coral *Symbiodinium* symbioses.  
562 *Glob. Chang. Biol.* **19**, 3306–3316 (2013).
- 563 23. Berkelmans, R. & van Oppen, M. J. H. The role of zooxanthellae in the thermal  
564 tolerance of corals: a ‘nugget of hope’ for coral reefs in an era of climate change. *Proc.*  
565 *R. Soc. B Biol. Sci.* **273**, 2305–2312 (2006).
- 566 24. Bay, L. K., Doyle, J., Logan, M. & Berkelmans, R. Recovery from bleaching is  
567 mediated by threshold densities of background thermo-tolerant symbiont types in a  
568 reef-building coral. *R. Soc. Open Sci.* **3**, (2016).
- 569 25. Theis, K. R. *et al.* Getting the hologenome concept right: An eco-evolutionary  
570 framework for hosts and their microbiomes. *mSystems* **1**, e00028–16 (2016).
- 571 26. Cunning, R. & Baker, A. C. Not just who, but how many: the importance of partner  
572 abundance in reef coral symbioses. *Front. Microbiol.* **5**, (2014).

- 573 27. Cuning, R., Silverstein, R. N. & Baker, A. C. Investigating the causes and  
574 consequences of symbiont shuffling in a multi-partner reef coral symbiosis under  
575 environmental change. *Proc. R. Soc. B* **282**, 20141725 (2015).
- 576 28. van Oppen, M. J. H., Oliver, J. K., Putnam, H. M. & Gates, R. D. Building coral reef  
577 resilience through assisted evolution. *Proc. Natl. Acad. Sci.* **112**, 2307–2313 (2015).
- 578 29. Baird, A. H., Guest, J. R. & Willis, B. L. Systematic and biogeographical patterns in  
579 the reproductive biology of scleractinian corals. *Annu. Rev. Ecol. Evol. Syst.* **40**, 551–  
580 571 (2009).
- 581 30. Douglas, A. E. & Werren, J. H. Holes in the hologenome: why host-microbe  
582 symbioses are not holobionts. *MBio* **7**, e02099–15 (2016).
- 583 31. Lynch, M. & Walsh, B. Genetics and analysis of quantitative traits. (1998).
- 584 32. Falconer, D. S. & Mackay, T. F. C. Introduction to quantitative genetics. *Longman* **19**,  
585 1 (1995).
- 586 33. Visscher, P. M., Hill, W. G. & Wray, N. R. Heritability in the genomics era—concepts  
587 and misconceptions. *Nat. Rev. Genet.* **9**, 255–266 (2008).
- 588 34. Hedrick, P. W., Coltman, D. W., Festa-Bianchet, M. & Pelletier, F. Not surprisingly,  
589 no inheritance of a trait results in no evolution. *Proc. Natl. Acad. Sci.* **111**, E4810–  
590 E4810 (2014).
- 591 35. Houle, D. Comparing evolvability and variability of quantitative traits. *Genetics* **130**,  
592 195–204 (1992).
- 593 36. Wilson, A. J. *et al.* An ecologist’s guide to the animal model. *J. Anim. Ecol.* **79**, 13–26  
594 (2010).
- 595 37. Franzenburg, S. *et al.* Distinct antimicrobial peptide expression determines host  
596 species-specific bacterial associations. *Proc. Natl. Acad. Sci.* **110**, E3730–E3738  
597 (2013).
- 598 38. Ley, R. E. *et al.* Evolution of mammals and their gut microbes. *Science (80)*. **320**,  
599 1647–1651 (2008).
- 600 39. Campbell, J. H. *et al.* Host genetic and environmental effects on mouse intestinal  
601 microbiota. *ISME J.* **6**, 2033–2044 (2012).
- 602 40. Benson, A. K. *et al.* Individuality in gut microbiota composition is a complex  
603 polygenic trait shaped by multiple environmental and host genetic factors. *Proc. Natl.*  
604 *Acad. Sci.* **107**, 18933–18938 (2010).
- 605 41. Parkinson, J. F., Gobin, B. & Hughes, W. O. H. Heritability of symbiont density  
606 reveals distinct regulatory mechanisms in a tripartite symbiosis. *Ecol. Evol.* (2016).

- 607 42. Liu, C. M. *et al.* *Staphylococcus aureus* and the ecology of the nasal microbiome. *Sci.*  
608 *Adv.* **1**, e1400216 (2015).
- 609 43. Davy, S. K., Allemand, D. & Weis, V. M. Cell biology of cnidarian-dinoflagellate  
610 symbiosis. *Microbiol. Mol. Biol. Rev.* **76**, 229–261 (2012).
- 611 44. Kuniya, N. *et al.* Possible involvement of Tachylectin-2-like lectin from *Acropora*  
612 *tenuis* in the process of *Symbiodinium* acquisition. *Fish. Sci.* **81**, 473–483 (2015).
- 613 45. Suzuki, G. *et al.* Early uptake of specific symbionts enhances the post-settlement  
614 survival of *Acropora* corals. *Mar. Ecol. Prog. Ser.* **494**, 149–158 (2013).
- 615 46. Yamashita, H., Suzuki, G., Hayashibara, T. & Koike, K. *Acropora* recruits harbor  
616 ‘rare’ *Symbiodinium* in the environmental pool. *Coral Reefs* **32**, 355–366 (2013).
- 617 47. Gómez-Cabrera, M. del C., Ortiz, J. C., Loh, W. K. W., Ward, S. & Hoegh-Guldberg,  
618 O. Acquisition of symbiotic dinoflagellates (*Symbiodinium*) by juveniles of the coral  
619 *Acropora longicyathus*. *Coral Reefs* **27**, 219–226 (2008).
- 620 48. Cumbo, V. R., Baird, A. H. & van Oppen, M. J. H. The promiscuous larvae: flexibility  
621 in the establishment of symbiosis in corals. *Coral Reefs* 1–10 (2013).
- 622 49. Abrego, D., van Oppen, M. J. H. & Willis, B. L. Highly infectious symbiont dominates  
623 initial uptake in coral juveniles. *Mol. Ecol.* **18**, 3518–3531 (2009).
- 624 50. Parkinson, J. E., Banaszak, A. T., Altman, N. S., LaJeunesse, T. C. & Baums, I. B.  
625 Intraspecific diversity among partners drives functional variation in coral symbioses.  
626 *Sci. Rep.* **5**, (2015).
- 627 51. Quigley, K. M., Willis, B. L. & Bay, L. K. Maternal effects and *Symbiodinium*  
628 community composition drive differential patterns in juvenile survival in the coral  
629 *Acropora tenuis*. *R. Soc. Open Sci.* **3**, (2016).
- 630 52. Spor, A., Koren, O. & Ley, R. Unravelling the effects of the environment and host  
631 genotype on the gut microbiome. *Nat. Rev. Microbiol.* **9**, 279–290 (2011).
- 632 53. Vangay, P., Ward, T., Gerber, J. S. & Knights, D. Antibiotics, pediatric dysbiosis, and  
633 disease. *Cell Host Microbe* **17**, 553–564 (2015).
- 634 54. Padilla-Gamiño, J. L., Pochon, X., Bird, C., Concepcion, G. T. & Gates, R. D. From  
635 parent to gamete: vertical transmission of *Symbiodinium* (Dinophyceae) ITS2 sequence  
636 assemblages in the reef building coral *Montipora capitata*. *PLoS One* **7**, e38440  
637 (2012).
- 638 55. Oliver, K. M., Smith, A. H. & Russell, J. A. Defensive symbiosis in the real world—  
639 advancing ecological studies of heritable, protective bacteria in aphids and beyond.  
640 *Funct. Ecol.* **28**, 341–355 (2014).



- 641 56. Moran, N. A., McCutcheon, J. P. & Nakabachi, A. Genomics and evolution of  
642 heritable bacterial symbionts. *Annu. Rev. Genet.* **42**, 165–190 (2008).
- 643 57. Vautrin, E. & Vavre, F. Interactions between vertically transmitted symbionts:  
644 cooperation or conflict? *Trends Microbiol.* **17**, 95–99 (2009).
- 645 58. Hirose, M. & Hidaka, M. Early development of zooxanthella-containing eggs of the  
646 corals *Porites cylindrica* and *Montipora digitata*: The endodermal localization of  
647 zooxanthellae. *Zoolog. Sci.* **23**, 873–881 (2006).
- 648 59. Ulstrup, K. E., Kuhl, M. & Bourne, D. G. Zooxanthellae harvested by ciliates  
649 associated with brown band syndrome of corals remain photosynthetically competent.  
650 *Appl. Environ. Microbiol.* **73**, 1968–1975 (2007).
- 651 60. Hirose, M., Reimer, J. D., Hidaka, M. & Suda, S. Phylogenetic analyses of potentially  
652 free-living *Symbiodinium* spp. isolated from coral reef sand in Okinawa, Japan. *Mar.*  
653 *Biol.* **155**, 105–112 (2008).
- 654 61. Ritson-Williams, R. *et al.* New perspectives on ecological mechanisms affecting coral  
655 recruitment on reefs. *Smithson. Contrib. fo Mar. Sci.* **38**, 437–457 (2009).
- 656 62. Wolf, J. B. & Wade, M. J. What are maternal effects (and what are they not)? *Philos.*  
657 *Trans. R. Soc. B Biol. Sci.* **364**, 1107–1115 (2009).
- 658 63. Weis, V., Reynolds, W., DeBoer, M. & Krupp, D. Host-symbiont specificity during  
659 onset of symbiosis between the dinoflagellates *Symbiodinium* spp. and planula larvae  
660 of the scleractinian coral *Fungia scutaria*. *Coral Reefs* **20**, 301–308 (2001).
- 661 64. Schwarz, J. A., Krupp, D. A. & Weis, V. M. Late larval development and onset of  
662 symbiosis in the scleractinian coral *Fungia scutaria*. *Biol. Bull.* **196**, 70–79 (1999).
- 663 65. Markell, D. A. & Wood-Charlson, E. M. Immunocytochemical evidence that  
664 symbiotic algae secrete potential recognition signal molecules in hospite. *Mar. Biol.*  
665 **157**, 1105–1111 (2010).
- 666 66. Bay, L. K. *et al.* Infection dynamics vary between *Symbiodinium* types and cell surface  
667 treatments during establishment of endosymbiosis with coral larvae. *Diversity* **3**, 356–  
668 374 (2011).
- 669 67. Fransolet, D., Roberty, S. & Plumier, J.C. Establishment of endosymbiosis: The case  
670 of cnidarians and *Symbiodinium*. *J. Exp. Mar. Bio. Ecol.* **420-421**, 1–7 (2012).
- 671 68. Mohamed, A. R. *et al.* The transcriptomic response of the coral *Acropora digitifera* to  
672 a competent *Symbiodinium* strain: the symbiosome as an arrested early phagosome.  
673 *Mol. Ecol.* (2016).
- 674 69. Schnitzler, C. E. & Weis, V. M. Coral larvae exhibit few measurable transcriptional

- 675 changes during the onset of coral-dinoflagellate endosymbiosis. *Mar. Genomics* **3**,  
676 107–116 (2010).
- 677 70. Cho, J. The heritable immune system. *Nat. Biotechnol.* **33**, 608–609 (2015).
- 678 71. Roederer, M. *et al.* The genetic architecture of the human immune system: a  
679 bioresource for autoimmunity and disease pathogenesis. *Cell* **161**, 387–403 (2015).
- 680 72. Gates, R. D., Hoegh-Guldberg, O., McFall-Ngai, M. J., Bil, K. Y. & Muscatine, L.  
681 Free amino acids exhibit anthozoan ‘host factor’ activity: They induce the release of  
682 photosynthate from symbiotic dinoflagellates *in-vitro*. *Proc. Natl. Acad. Sci.* **92**, 7430–  
683 7434 (1995).
- 684 73. Lee, S. T. M., Davy, S. K., Tang, S.-L. & Kench, P. S. Mucus sugar content shapes the  
685 bacterial community structure in thermally stressed *Acropora muricata*. *Front.*  
686 *Microbiol.* **7**, (2016).
- 687 74. Hagedorn, M. *et al.* Trehalose is a chemical attractant in the establishment of coral  
688 symbiosis. *PLoS One* **10**, e0117087 (2015).
- 689 75. Lewis, Z. T. *et al.* Maternal fucosyltransferase 2 status affects the gut bifidobacterial  
690 communities of breastfed infants. *Microbiome* **3**, 1 (2015).
- 691 76. Golberg, K., Eltzov, E., Shnit-Orland, M., Marks, R. S. & Kushmaro, A.  
692 Characterization of quorum sensing signals in coral-associated bacteria. *Microb. Ecol.*  
693 **61**, 783–792 (2011).
- 694 77. Gloor, G. B. *et al.* Type I repressors of P element mobility. *Genetics* **135**, 81–95  
695 (1993).
- 696 78. Edgar, R. C. UPARSE: highly accurate OTU sequences from microbial amplicon  
697 reads. *Nat. Methods* **10**, 996–998 (2013).
- 698 79. Altschul, S. F., Gish, W., Miller, W., Myers, E. W. & Lipman, D. J. Basic local  
699 alignment search tool. *J. Mol. Biol.* **215**, (1990).
- 700 80. Camacho, C. *et al.* BLAST+: architecture and applications. *BMC Bioinformatics* **10**,  
701 (2009).
- 702 81. Paradis, E., Claude, J. & Strimmer, K. APE: analyses of phylogenetics and evolution  
703 in R language. *Bioinformatics* **20**, 289–290 (2004).
- 704 82. FitzJohn, R. G. Diversitree: comparative phylogenetic analyses of diversification in R.  
705 *Methods Ecol. Evol.* **3**, 1084–1092 (2012).
- 706 83. Sievers, F. *et al.* Fast, scalable generation of high-quality protein multiple sequence  
707 alignments using Clustal Omega. *Mol. Syst. Biol.* **7**, (2011).
- 708 84. Love, M. I., Huber, W. & Anders, S. Moderated estimation of fold change and

- 709 dispersion for RNA-seq data with DESeq2. *Genome Biol.* **15**, 1–21 (2014).
- 710 85. McMurdie, P. J. & Holmes, S. phyloseq: an R package for reproducible interactive  
711 analysis and graphics of microbiome census data. *PLoS One* **8**, e61217 (2013).
- 712 86. R Core Team. R: A language and environment for statistical computing. (2012).
- 713 87. Leinster, T. & Cobbold, C. A. Measuring diversity: the importance of species  
714 similarity. *Ecology* **93**, 477–489 (2012).
- 715 88. Cunning, R. & Baker, A. C. Excess algal symbionts increase the susceptibility of reef  
716 corals to bleaching. *Nat. Clim. Chang.* (2012).
- 717 89. Cunning, R. *et al.* Dynamic regulation of partner abundance mediates response of reef  
718 coral symbioses to environmental change. *Ecology* **96**, 1411–1420 (2015).
- 719 90. Kruuk, L. E. B. Estimating genetic parameters in natural populations using the ‘animal  
720 model’. *Philos. Trans. R. Soc. London B Biol. Sci.* **359**, 873–890 (2004).
- 721 91. Hadfield, J. D. MCMC methods for multi-response generalized linear mixed models:  
722 the MCMCglmm R package. *J. Stat. Softw.* **33**, 1–22 (2010).
- 723 92. Pinheiro, J., Bates, D., DebRoy, S. & Sarkar, D. Core Team R. 2014. nlme: linear and  
724 nonlinear mixed effects models. R package version 3.1-118.

725

## 726 **Acknowledgements**

727 We would like to thank Margaux Hein, Mikhail Matz, Marie Strader, Greg Torda,  
728 Sarah Davies, Natalie Andrade, Tess Hill and the staff at Orpheus Island Research Station for  
729 help with field work and spawning at Orpheus Island. We also thank Dr. Ray Berkelmans and  
730 the crew on the RV Ferguson for help with the collection of corals from the northern GBR.

731 All samples of *A. tenuis* from Wilkie Island and Orpheus Island and *M. digitata* from  
732 Orpheus Island were collected under Great Barrier Reef Marine Park Authority permits:  
733 G12/35236.1, G13/36318.1, and G10/33312.1. Funding was provided by the Australian  
734 Research Council through ARC CE1401000020, ARC DP130101421 to B.L.W. and AIMS to  
735 L.K.B.

736

## 737 **Author Contributions**

738 K.M.Q., B.L.W., and L.K.B. designed and conducted the experiments, K.M.Q. analysed the  
739 data and wrote the manuscript, and all authors made comments on the manuscript.

740

741 **Competing Financial Interest:** The authors declare no competing financial interests.
